# Supplementary material
Source: Springer Nature journal article supplement (https://www.springermedizin.de/resource/supplementary/12888_2013_1640_MOESM4_ESM.pdf/9481044)

**Study name****Statistics for each study****Odds ratio and 95%CI**

|                              | <b>Odds ratio</b> | <b>Lower limit</b> | <b>Upper limit</b> | <b>p-Value</b> |
|------------------------------|-------------------|--------------------|--------------------|----------------|
| Degenhardt et al. 2001 [39]  | 1.40              | 0.83               | 2.35               | 0.204          |
| Agosti et al. 2002 [26]      | 2.60              | 1.50               | 4.50               | 0.001          |
| Chabrol et al. 2005 [34]     | 1.61              | 0.84               | 3.07               | 0.151          |
| Beard et al. 2006 [27]       | 0.78              | 0.18               | 3.30               | 0.735          |
| Zvolensky et al. 2006 [54]   | 2.10              | 1.06               | 4.15               | 0.033          |
| Roberts et al. 2007 [49]     | 0.90              | 0.39               | 2.06               | 0.803          |
| Wittchen et al. 2007 [53]    | 1.70              | 1.13               | 2.56               | 0.011          |
| Buckner et al. 2008 [30]     | 4.88              | 1.43               | 16.65              | 0.011          |
| Low et al. 2008 [45]         | 1.40              | 0.41               | 4.80               | 0.592          |
| Cascone et al. 2011 [33]     | 1.02              | 0.97               | 1.08               | 0.470          |
| Martins & Gorelick 2011 [46] | 3.20              | 1.98               | 5.16               | 0.000          |
| Degenhardt et al. 2013 [41]  | 2.20              | 1.10               | 4.40               | 0.026          |
| van der Pol et al. 2013 [51] | 1.12              | 0.48               | 2.62               | 0.794          |
|                              | 1.68              | 1.23               | 2.31               | 0.001          |

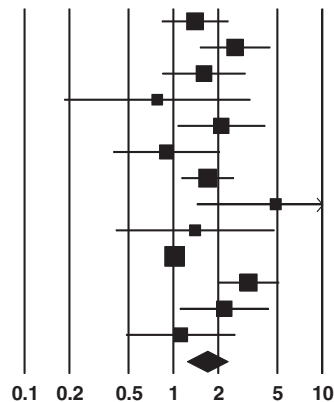

- association + association

**Funnel Plot of Standard Error by Log odds ratio**

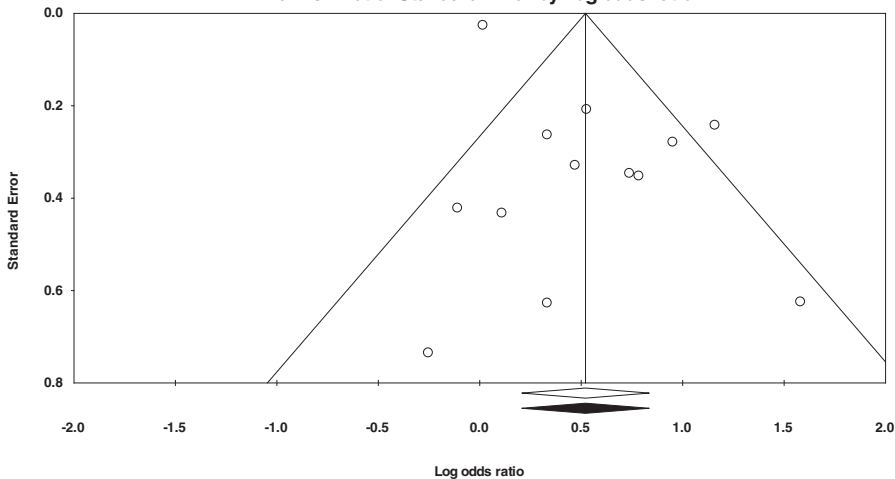

Supplement: MOESM4 [file 9481044]
